# Supplementary material for: Clinical adhesion score (CLAS): development of a novel clinical score for adhesion-related complications in abdominal and pelvic surgery
Source: Springer Nature journal article supplement (doi:10.1007/s00464-020-07621-5), 2020-05-14
Supplement: MOESM3 [file 17983086]

## Supplementary File 3: Score items excluded in the Delphi Procedure

### Excluded Outcomes *(In italic: specific reason for exclusion if applicable)*

#### Small Bowel Obstruction:

- Conservative treatment (i.a. nasogastric tube decompression, intravenous fluids therapy)  
*Alternative options including time criteria were selected as most appropriate option and included with consensus.*

#### Difficulties at reoperation:

- No difficulties at reoperation  
*Alternative option 'reoperation without adhesiolysis' was selected as most appropriate option and included with consensus.*
- Limited adhesiolysis (adhesiolysis <30min or adhesiolysis without injuries)  
*Alternative option without time criteria were selected as most appropriate option and included with consensus*
- Extensive adhesiolysis (Adhesiolysis >30min or Serosal bowel injuries)  
*Alternative option without time criteria were selected as most appropriate option and included with consensus*

#### Chronic Abdominal Pain:

- Intermittent or continuous chronic abdominal/pelvic pain during 6 months
- Intermittent or continuous chronic abdominal/pelvic pain during 12 months (or more)
- Chronic abdominal/pelvic pain with (deep) dyspareunia, dysuria or dyschezia
- Use of narcotics
- Surgical treatment for pain  
*Reason for exclusion of outcomes listed above: Outcomes describing percentage of inability due to pain were preferred and included with consensus.*

#### Female Infertility:

- Failure to conceive 1 year (Unprotected intercourse without conception 1 year)

### Excluded Weight Factors

#### Small Bowel Obstruction:

- Small bowel obstruction, not further specified

- History of abdominal or pelvic surgery

Difficulties At Reoperation:

- Difficulties at reoperation, not further specified
- Adhesions found preoperatively on specialized imaging (cineMRI, visceral slide ultrasound)

Chronic Abdominal Pain:

- Chronic abdominal or pelvic pain, not further specified
- In women: non-cyclic pain
- Chronic pain in presence of other gastrointestinal complaints
- Psychiatric illness and psychological disturbances excluded or screened for
- Reduction in pain after adhesiolysis, followed by return of pain

Female infertility:

- Alternative explanation for female infertility at fertility investigation
- Female infertility, not further specified
- History of abdominal or pelvic surgery
- Abnormalities at fertility investigation (not further specified)

**Supplementary File related to: “Clinical Adhesion Score (CLAS): Development of a novel clinical score for adhesion-related complications in abdominal and pelvic surgery”**

Elisabeth Jacomine Lier<sup>1</sup> , Barend A.W. van den Beukel<sup>1</sup> , Larsa Gawria<sup>1</sup> , Prof. Dr. Philip J. van der Wees<sup>2</sup> , Leontine van den Hil<sup>3</sup> , Dr. Nicole D. Bouvy<sup>3,4</sup> , Prof. Dr. Ying Cheong<sup>5,6</sup> , Prof. Dr. Rudy-Leon de Wilde<sup>7</sup> , CLAS Collaboration, Prof. Dr. Harry van Goor<sup>1</sup> , Dr. Martijn W.J. Stommel<sup>1</sup> , Dr. Richard P.G. ten Broek<sup>1</sup>

**Corresponding Author:**

Janienke Lier, Department of Surgery, Radboud university medical center, Nijmegen, The Netherlands

Email: [janienkelier@gmail.com](mailto:janienkelier@gmail.com)
